# Supplementary material
Source: PubMed Central journal article supplement (PMC4298355)
Supplement: jp511040p_si_001.pdf [file jp511040p_si_001.pdf]

## Supporting Information

# Experimental and theoretical studies of halide binding with a p-xylyl based azamacrocycle

*Lucky Ahmed, Md Mhahabubur Rhaman, John S. Mendy, Jing Wang, Frank R. Fronczek,*

*Douglas R. Powell, and Jerzy Leszczynski and Md. Alamgir Hossain*

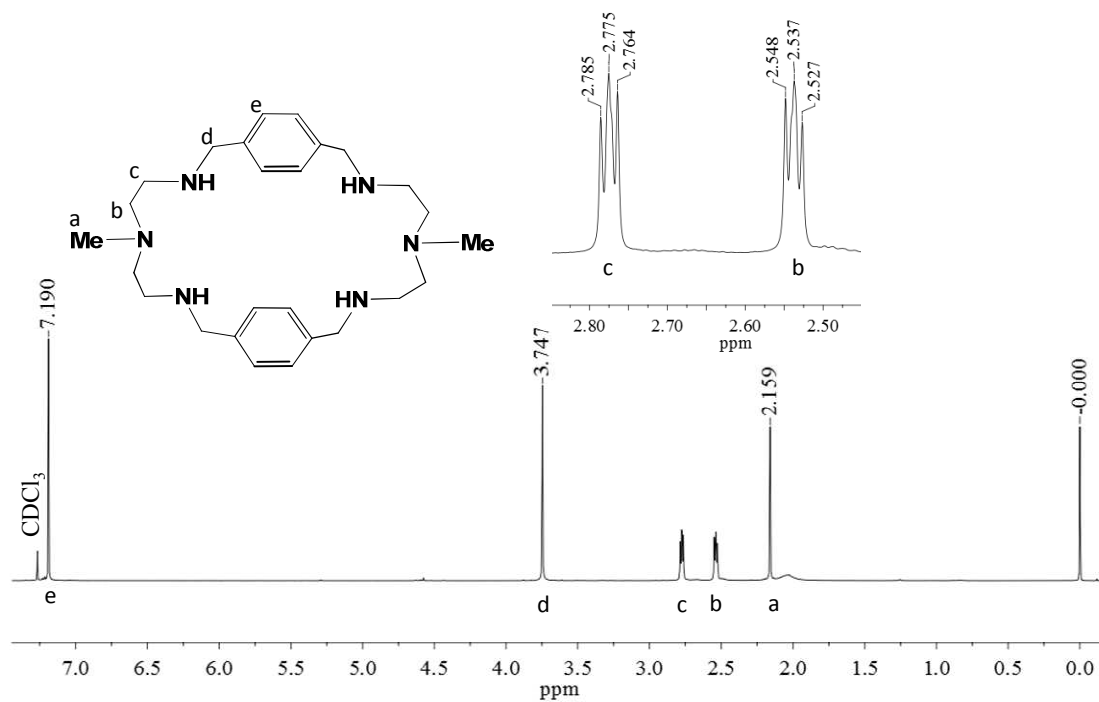

**Figure S1.** <sup>1</sup>H NMR spectrum of L in D<sub>2</sub>O.

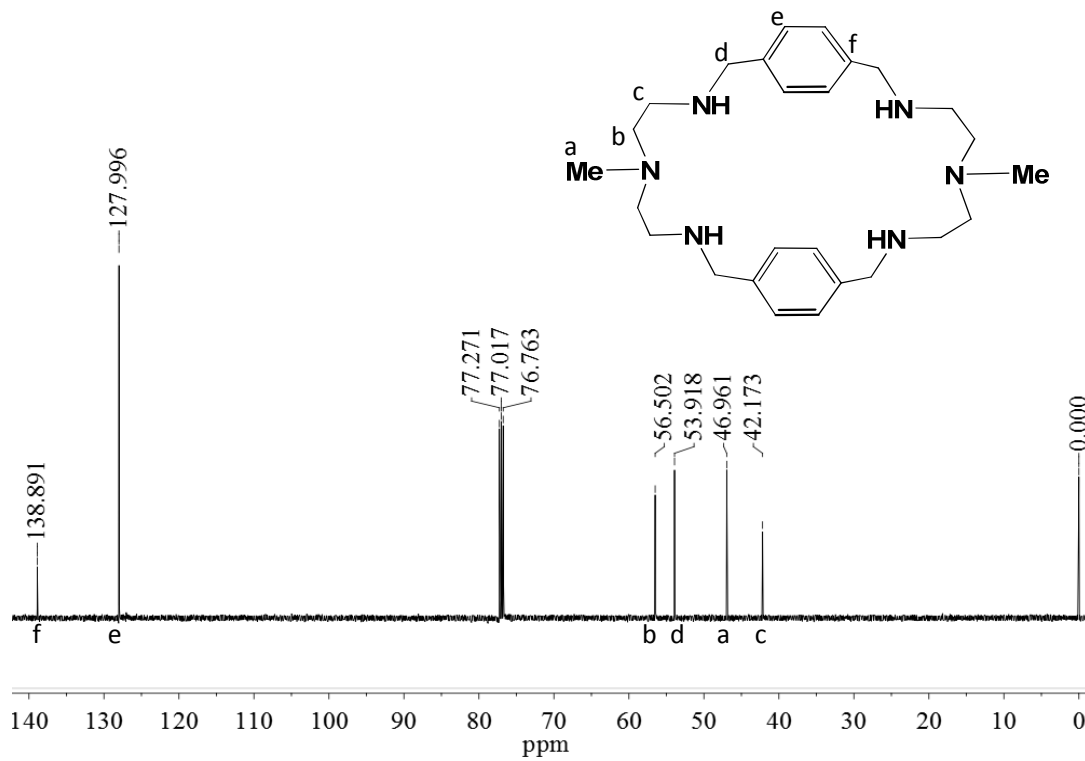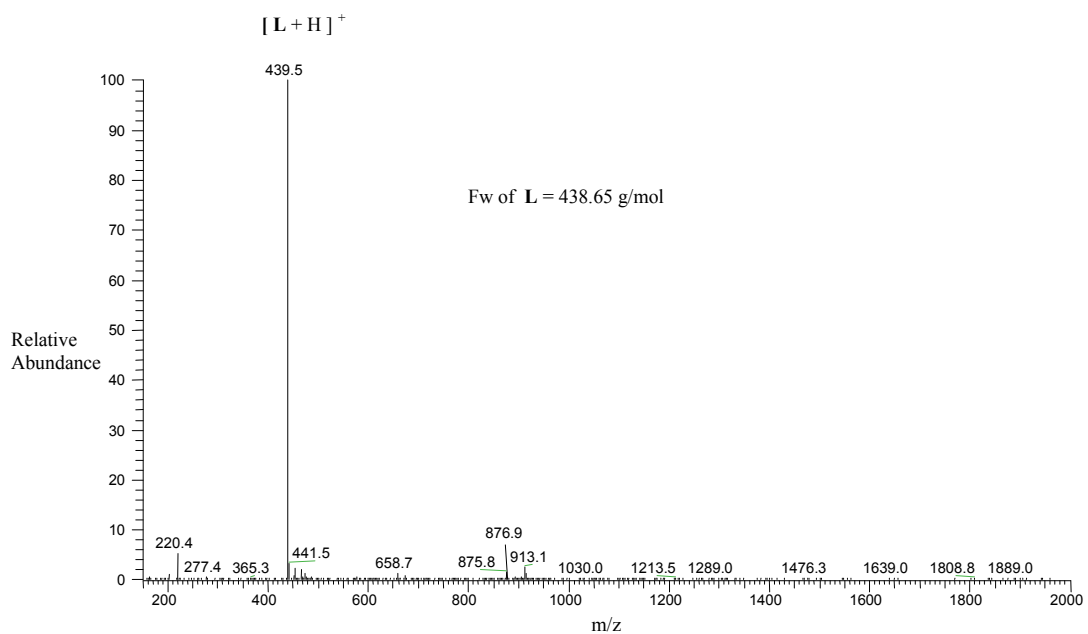

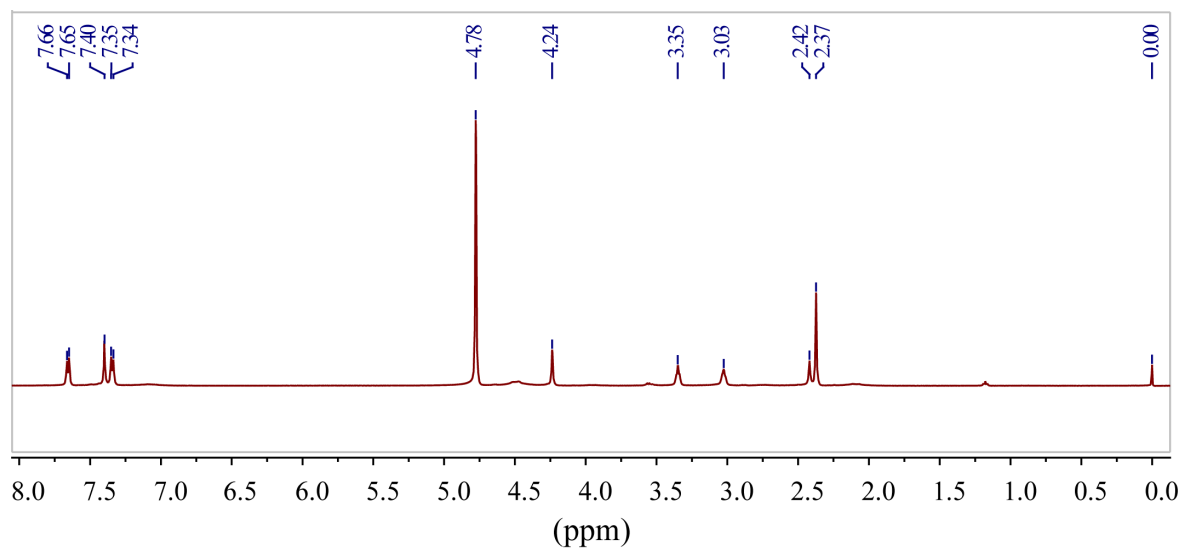

**Figure S4.**  $^1\text{H}$  NMR spectrum of L-TsO complex in  $\text{D}_2\text{O}$ .

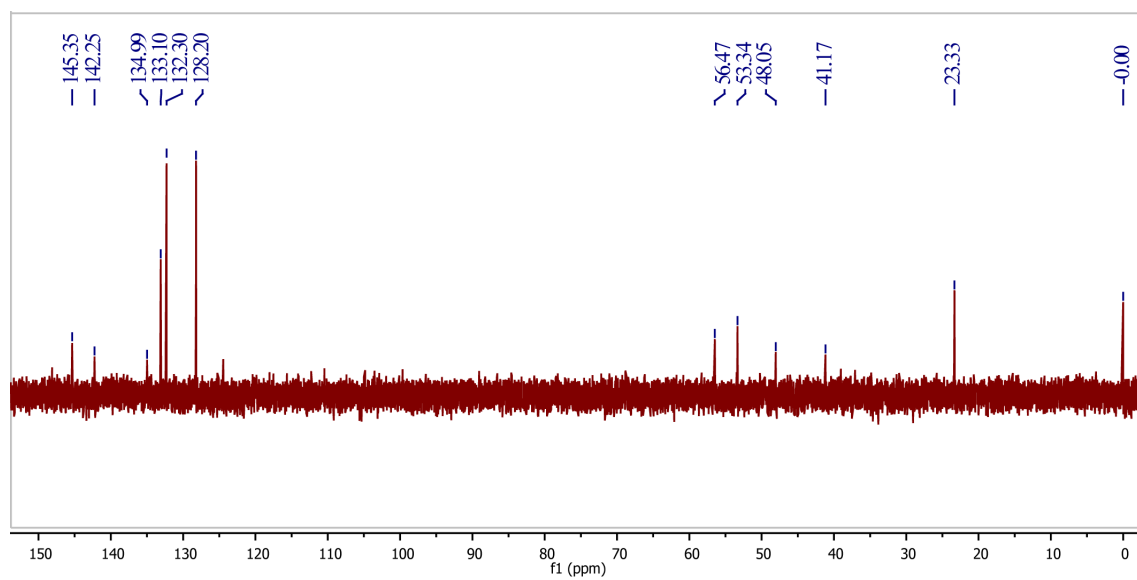

**Figure S5.**  $^{13}\text{C}$  NMR spectrum of L-TsO complex in  $\text{D}_2\text{O}$ .

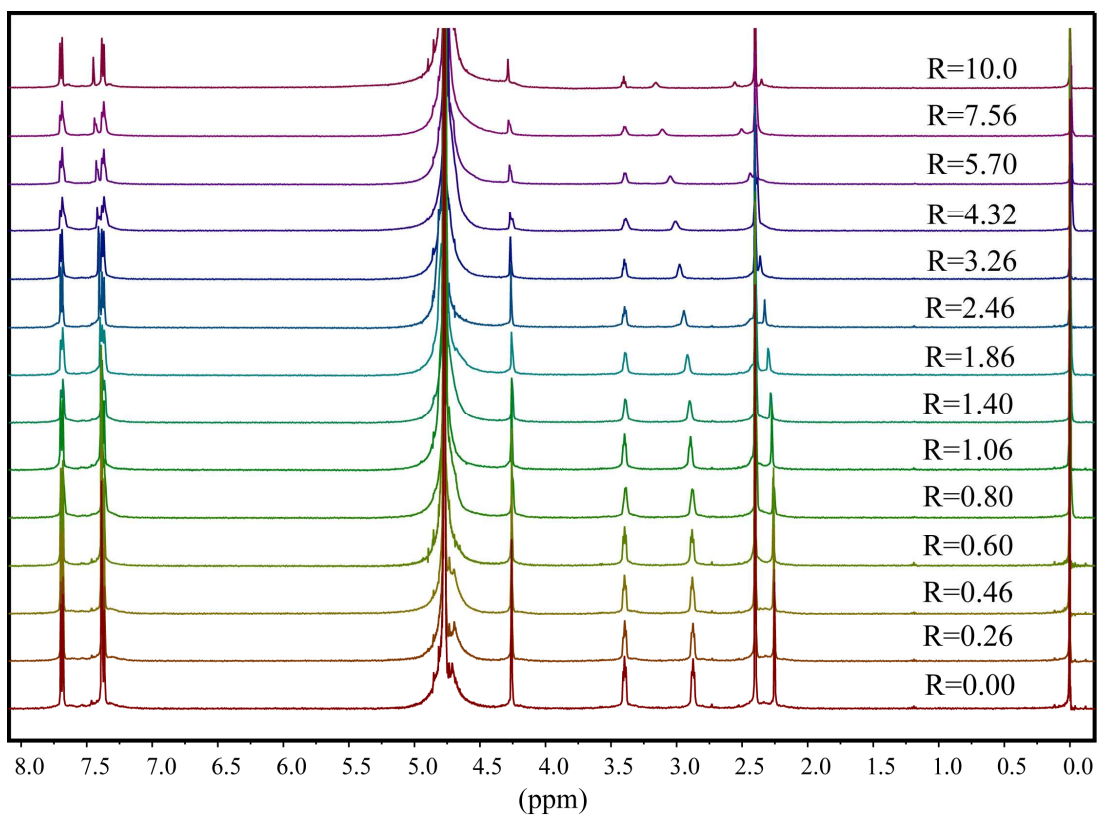

**Figure S6.**  $^1\text{H}$  NMR spectra of L (2 mM) with an increasing amount of NaF ( $R = [\text{NaF}]_0/[\text{L}]_0$ ) in  $\text{D}_2\text{O}$  at  $\text{pH} = 2.1$ .

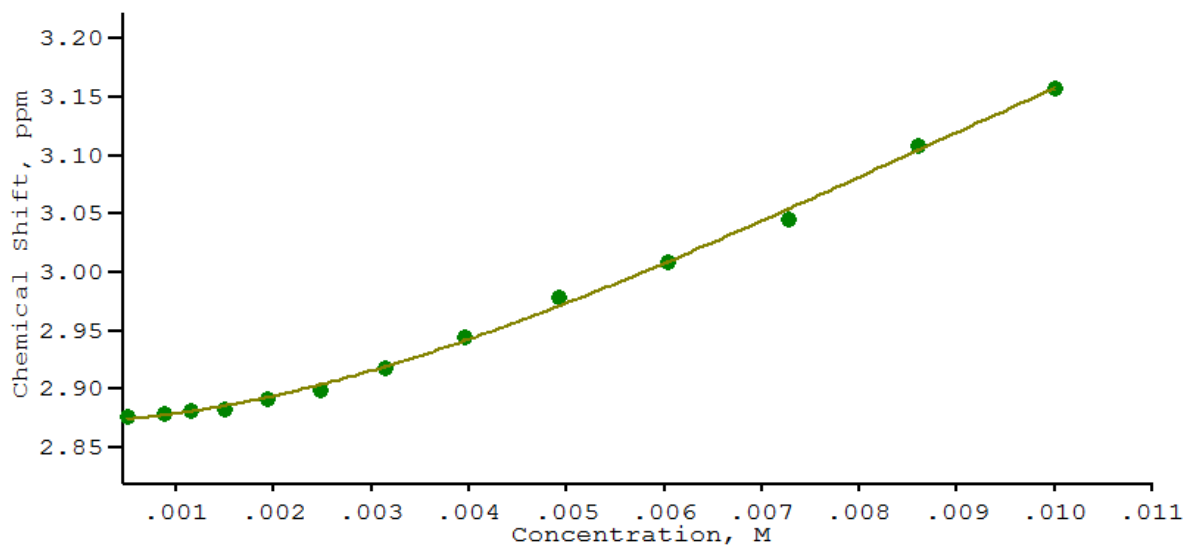

**Figure S7.**  $^1\text{H}$  NMR titration curve of L with NaF showing the change in the chemical shifts of aliphatic  $\text{CH}_3\text{NCH}_2$  against an increasing amount of anions in  $\text{D}_2\text{O}$  at  $\text{pH} = 2.1$ .

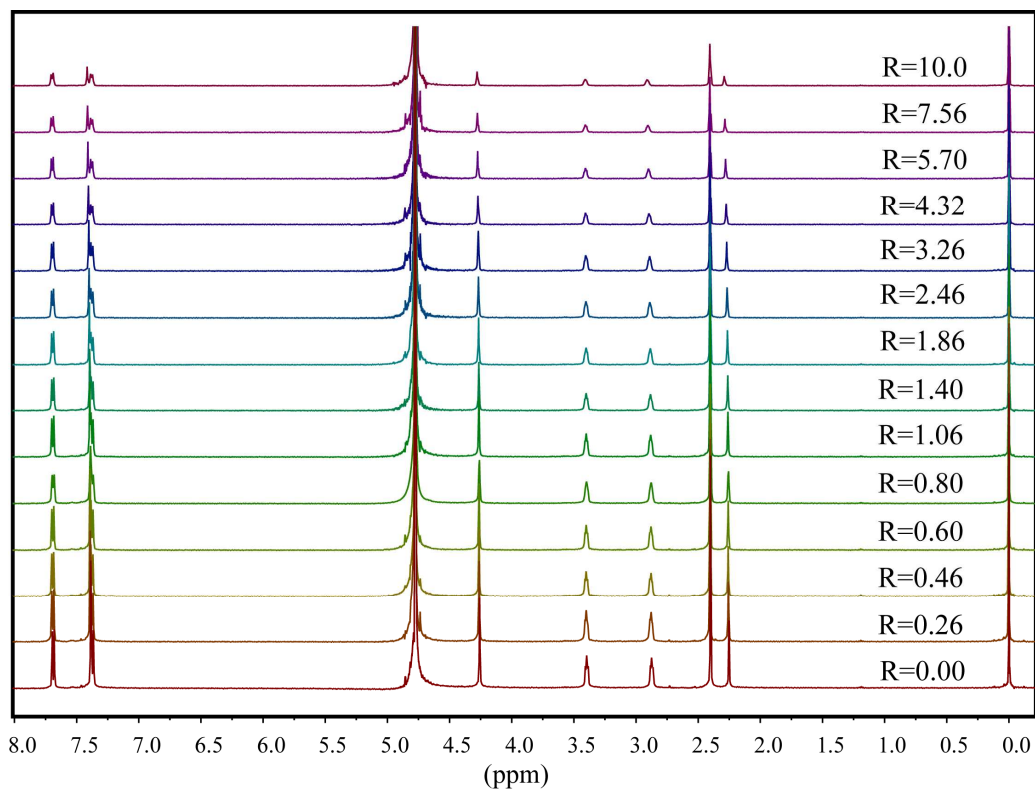

**Figure S8.**  $^1\text{H}$  NMR spectra of L (2 mM) with an increasing amount of NaCl ( $R = [\text{NaCl}]_0/[\text{L}]_0$ ) in  $\text{D}_2\text{O}$  at pH = 2.1.

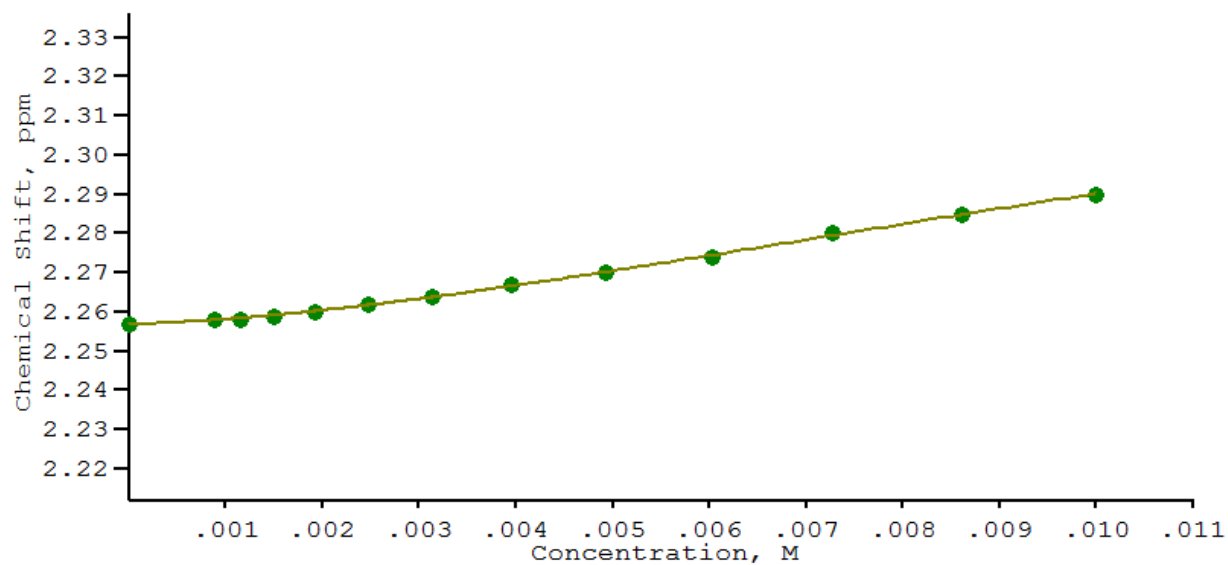

**Figure S9.**  $^1\text{H}$  NMR titration curve of L with NaCl showing the change in the chemical shifts of aliphatic  $\text{NCH}_3$  against an increasing amount of anions in  $\text{D}_2\text{O}$  at pH = 2.1.

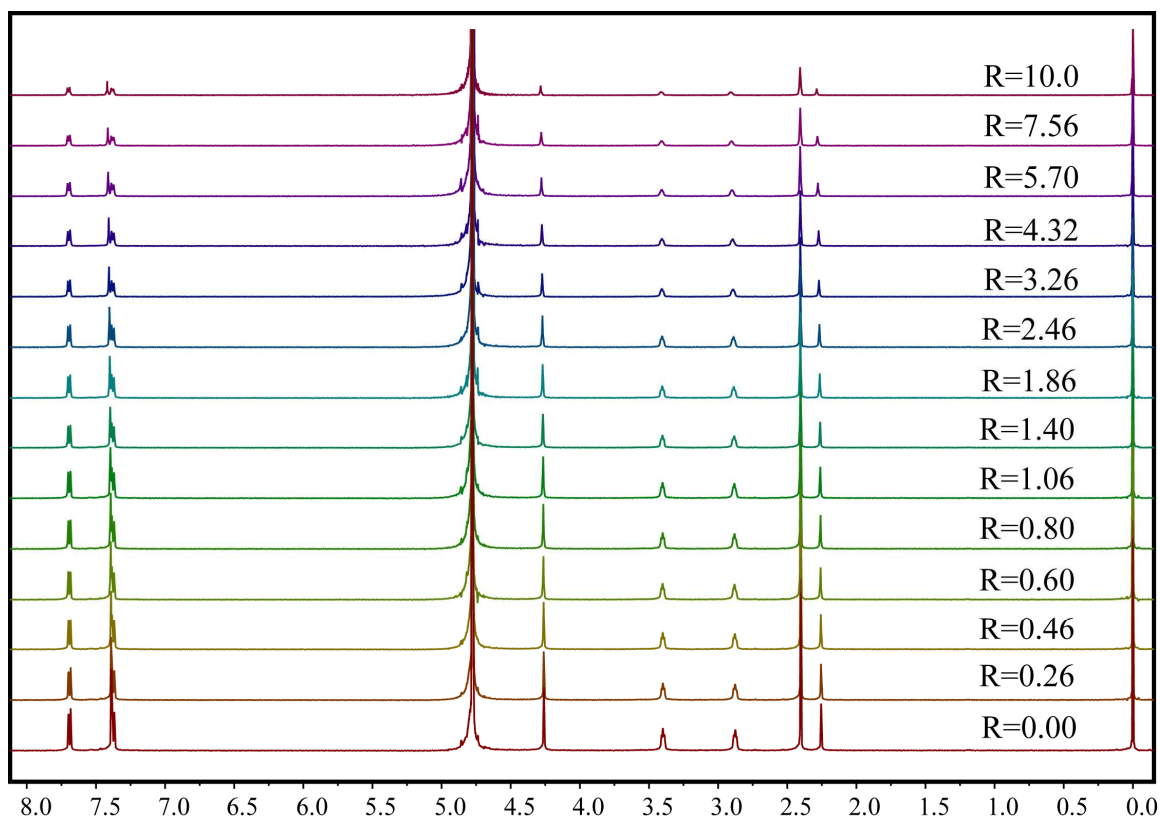

**Figure S10.** <sup>1</sup>H NMR spectra of L (2 mM) with an increasing amount of NaBr ( $R = [\text{NaBr}]_0/[\text{L}]_0$ ) in D<sub>2</sub>O at pH = 2.1.

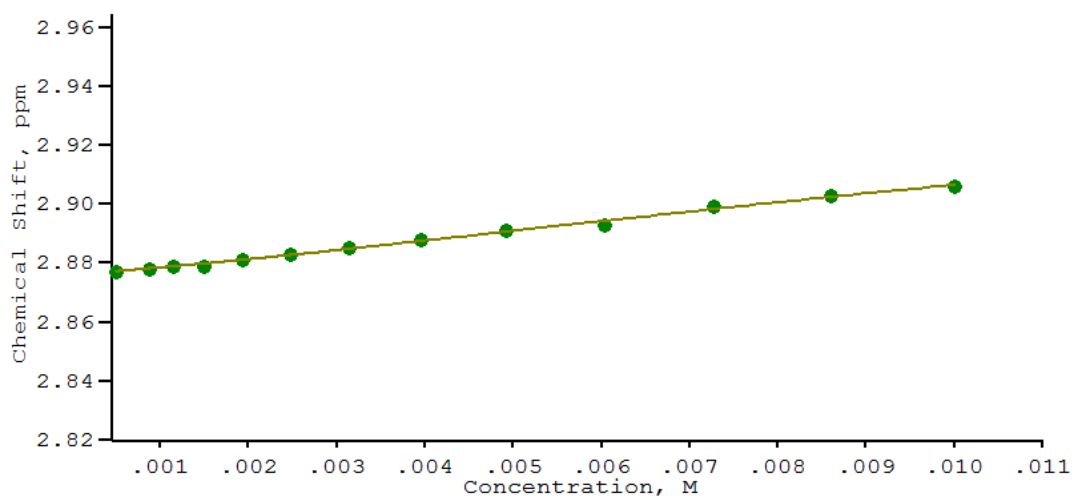

**Figure S11.** <sup>1</sup>H NMR titration curve of L with NaBr showing the change in the chemical shifts of aliphatic NCH<sub>3</sub> against an increasing amount of anions in D<sub>2</sub>O at pH = 2.1.

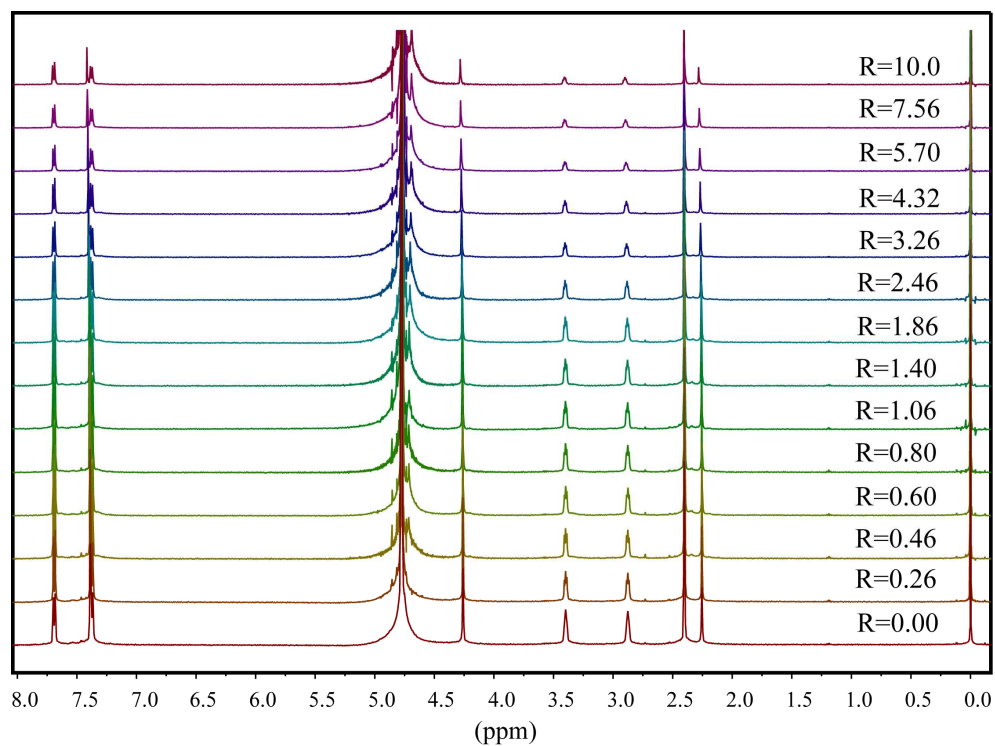

**Figure S12.** <sup>1</sup>H NMR spectra of L (2 mM) with an increasing amount of NaI ( $R = [\text{NaI}]_0/[\text{L}]_0$ ) in D<sub>2</sub>O at pH = 2.1.

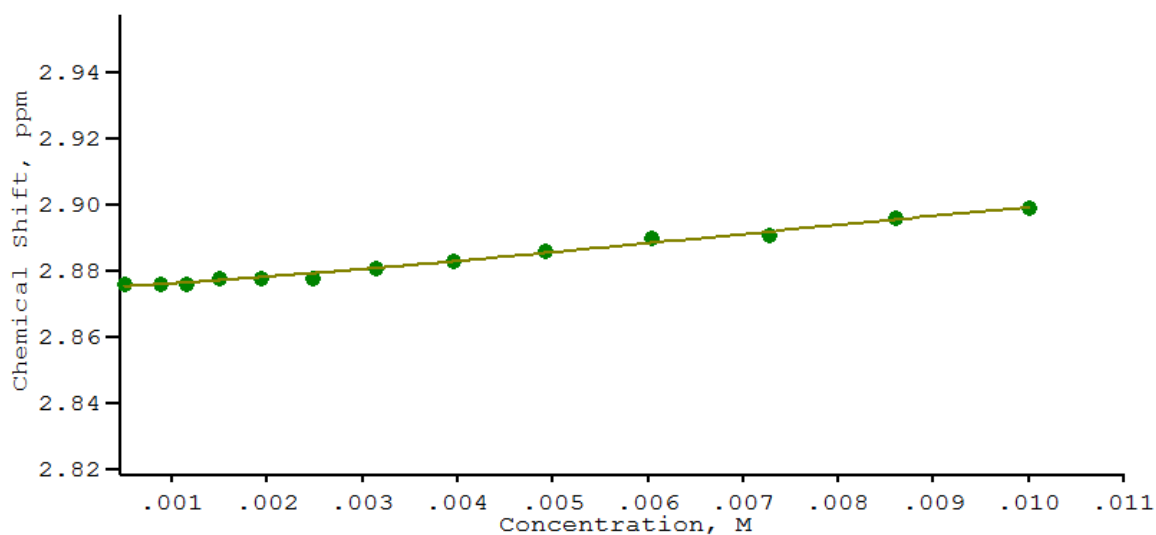

**Figure S13.** <sup>1</sup>H NMR titration curve of L with NaI showing the change in the chemical shifts of aliphatic NCH<sub>3</sub> against an increasing amount of anions in D<sub>2</sub>O at pH = 2.1.

**Table S1.** Cartesian coordinates (in Å) and total energy (in au) for  $[\text{H}_6\text{L}]^{6+}$  in gas phase.  
Total energy: -1345.295874 au.

|    |     |            |            |            |
|----|-----|------------|------------|------------|
| 1  | N1  | -4.3950160 | 1.8780200  | -0.2751620 |
| 2  | H2  | -3.6961570 | 1.5130680  | -0.9309390 |
| 3  | C3  | -4.9019270 | 0.6927400  | 0.5492370  |
| 4  | H4  | -5.9268750 | 0.9294320  | 0.8452930  |
| 5  | H5  | -4.2864410 | 0.6296500  | 1.4480040  |
| 6  | C6  | -4.8097390 | -0.6238650 | -0.2529760 |
| 7  | H7  | -5.4474610 | -0.6170520 | -1.1396400 |
| 8  | H8  | -3.7789520 | -0.8244350 | -0.5583820 |
| 9  | N9  | -5.2301840 | -1.8130020 | 0.5670660  |
| 10 | H10 | -4.8365170 | -1.7688500 | 1.5147440  |
| 11 | H11 | -6.2532850 | -1.8155500 | 0.6908360  |
| 12 | C12 | -4.8414950 | -3.1799220 | -0.0438470 |
| 13 | H13 | -5.3984290 | -3.9148050 | 0.5438420  |
| 14 | H14 | -5.2377770 | -3.1799870 | -1.0604450 |
| 15 | C15 | -3.3541370 | -3.4672310 | -0.0039100 |
| 16 | C16 | -2.6947640 | -3.6644630 | 1.2143320  |
| 17 | H17 | -3.2213960 | -3.5681580 | 2.1605210  |
| 18 | C18 | -1.3726640 | -4.0992970 | 1.2415200  |
| 19 | H19 | -0.9071530 | -4.2996950 | 2.2012430  |
| 20 | C20 | -0.6952140 | -4.3786700 | 0.0490450  |
| 21 | C21 | -1.3599780 | -4.2020420 | -1.1685540 |
| 22 | H22 | -0.8968290 | -4.4952710 | -2.1070070 |
| 23 | C23 | -2.6715880 | -3.7330630 | -1.1957380 |
| 24 | H24 | -3.1822850 | -3.6608850 | -2.1508250 |
| 25 | C25 | 0.7011290  | -4.9656060 | 0.0959120  |
| 26 | H26 | 0.9949240  | -5.2412550 | 1.1096510  |
| 27 | H27 | 0.8185040  | -5.8317180 | -0.5595150 |
| 28 | N28 | 1.7345750  | -3.9176210 | -0.3919860 |
| 29 | H29 | 1.4467380  | -3.0255930 | 0.0183710  |
| 30 | H30 | 1.6061510  | -3.8230420 | -1.4063040 |
| 31 | C31 | 3.1912640  | -4.2228280 | -0.0955840 |
| 32 | H32 | 3.3930970  | -5.2020510 | -0.5378820 |
| 33 | H33 | 3.2887380  | -4.3316890 | 0.9876840  |
| 34 | C34 | 4.1785740  | -3.2082470 | -0.7046500 |
| 35 | H35 | 3.7958930  | -2.7997510 | -1.6423300 |
| 36 | H36 | 5.1133100  | -3.7248210 | -0.9352610 |
| 37 | N37 | 4.5644790  | -2.0307840 | 0.2025240  |
| 38 | H38 | 3.7531960  | -1.7905260 | 0.7793560  |
| 39 | C39 | 4.9405890  | -0.7866630 | -0.5942220 |
| 40 | H40 | 4.2893720  | -0.7536140 | -1.4700450 |
| 41 | H41 | 5.9694870  | -0.9325230 | -0.9342050 |
| 42 | C42 | 4.7748990  | 0.5062550  | 0.2348160  |
| 43 | H43 | 3.7480020  | 0.6193400  | 0.5938470  |



|    |     |            |            |            |
|----|-----|------------|------------|------------|
| 44 | H44 | 5.4542580  | 0.5450210  | 1.0885140  |
| 45 | N45 | 5.0612430  | 1.7333110  | -0.5891380 |
| 46 | H46 | 6.0716640  | 1.7963040  | -0.7816740 |
| 47 | H47 | 4.6073320  | 1.6806370  | -1.5089020 |
| 48 | C48 | 4.6441540  | 3.0683040  | 0.0733110  |
| 49 | H49 | 5.2005500  | 3.8324260  | -0.4760100 |
| 50 | H50 | 5.0311480  | 3.0313020  | 1.0927360  |
| 51 | C51 | 3.1576090  | 3.3688830  | 0.0323240  |
| 52 | C52 | 2.4757820  | 3.6135190  | 1.2301000  |
| 53 | H53 | 2.9696770  | 3.4661790  | 2.1852970  |
| 54 | C54 | 1.2044930  | 4.1830420  | 1.2168870  |
| 55 | H55 | 0.7689150  | 4.4768120  | 2.1687400  |
| 56 | C56 | 0.5699640  | 4.4841720  | 0.0069000  |
| 57 | C57 | 1.2278360  | 4.1848760  | -1.1915230 |
| 58 | H58 | 0.7902280  | 4.4646660  | -2.1445250 |
| 59 | C59 | 2.5147840  | 3.6514000  | -1.1779490 |
| 60 | H60 | 3.0363140  | 3.5579920  | -2.1272530 |
| 61 | C61 | -0.6701630 | 5.3580830  | -0.0253330 |
| 62 | H62 | -0.4982130 | 6.2787160  | 0.5388510  |
| 63 | H63 | -0.9591050 | 5.6300650  | -1.0416690 |
| 64 | N64 | -1.9283220 | 4.7334520  | 0.6243750  |
| 65 | H65 | -1.6502080 | 4.3288310  | 1.5265380  |
| 66 | H66 | -2.5658220 | 5.5101120  | 0.8523790  |
| 67 | C67 | -2.6441940 | 3.7223600  | -0.2319210 |
| 68 | H68 | -1.8703410 | 3.0551250  | -0.6213020 |
| 69 | H69 | -3.0830210 | 4.2794330  | -1.0621480 |
| 70 | C70 | -3.7015750 | 2.9384580  | 0.5771500  |
| 71 | H71 | -3.2225750 | 2.4235650  | 1.4114700  |
| 72 | H72 | -4.4873120 | 3.5876750  | 0.9721730  |
| 73 | C73 | -5.5155020 | 2.4781910  | -1.1156360 |
| 74 | H74 | -5.9574070 | 1.6943670  | -1.7297760 |
| 75 | H75 | -5.1067710 | 3.2535040  | -1.7618550 |
| 76 | H76 | -6.2607830 | 2.8959620  | -0.4382820 |
| 77 | C77 | 5.6752980  | -2.4415330 | 1.1614160  |
| 78 | H78 | 5.8608340  | -1.6357340 | 1.8698850  |
| 79 | H79 | 6.5689190  | -2.6529360 | 0.5728210  |
| 80 | H80 | 5.3658460  | -3.3349840 | 1.7029760  |

**Table S2.** Cartesian coordinates (in Å) and total energy (in au) for  $[\text{H}_6\text{L}(\text{F})]^{5+}$  in gas phase.  
Total energy: -1445.828645 au.

|   |    |            |            |            |
|---|----|------------|------------|------------|
| 1 | C1 | -0.4677310 | -3.8171480 | -1.3229080 |
| 2 | H2 | -0.9310390 | -3.8754860 | -2.3016870 |
| 3 | C3 | -1.2540650 | -3.6642930 | -0.1786450 |
| 4 | C4 | -0.6359520 | -3.6617610 | 1.0735040  |
| 5 | H5 | -1.2197930 | -3.6293900 | 1.9884130  |

|    |     |            |            |            |
|----|-----|------------|------------|------------|
| 6  | C6  | -2.7627120 | -3.6467700 | -0.3232010 |
| 7  | H7  | -3.0453840 | -3.5874340 | -1.3743380 |
| 8  | H8  | -3.1997160 | -4.5570770 | 0.0963690  |
| 9  | N9  | -3.4247680 | -2.4793060 | 0.3689820  |
| 10 | H10 | -3.0315360 | -1.5414050 | 0.0585340  |
| 11 | H11 | -3.2454190 | -2.5454950 | 1.3743200  |
| 12 | C12 | -4.9181870 | -2.4551340 | 0.1538290  |
| 13 | H13 | -5.3275970 | -3.3732380 | 0.5790580  |
| 14 | H14 | -5.0832540 | -2.4875010 | -0.9246320 |
| 15 | C15 | -5.6067000 | -1.2546060 | 0.8082430  |
| 16 | H16 | -5.1629990 | -1.0453410 | 1.7830190  |
| 17 | H17 | -6.6605880 | -1.4906890 | 0.9693600  |
| 18 | N18 | -5.5304630 | 0.0002470  | -0.0250760 |
| 19 | H19 | -4.5413620 | 0.0001550  | -0.4018870 |
| 20 | C20 | -5.6064090 | 1.2550540  | 0.8083210  |
| 21 | H21 | -5.1625870 | 1.0456660  | 1.7830170  |
| 22 | H22 | -6.6602400 | 1.4912720  | 0.9696090  |
| 23 | C23 | -4.9178180 | 2.4555300  | 0.1538960  |
| 24 | H24 | -5.0829500 | 2.4879720  | -0.9245530 |
| 25 | H25 | -5.3270810 | 3.3736650  | 0.5791990  |
| 26 | N26 | -3.4243780 | 2.4795050  | 0.3689680  |
| 27 | H27 | -3.2449840 | 2.5455770  | 1.3743050  |
| 28 | H28 | -3.0312770 | 1.5416150  | 0.0584370  |
| 29 | C29 | -2.7621970 | 3.6469290  | -0.3231490 |
| 30 | H30 | -3.1991390 | 4.5572640  | 0.0964330  |
| 31 | H31 | -3.0448340 | 3.5876540  | -1.3743000 |
| 32 | C32 | -1.2535490 | 3.6643350  | -0.1785420 |
| 33 | C33 | -0.4672280 | 3.8179600  | -1.3227120 |
| 34 | H34 | -0.9305440 | 3.8769470  | -2.3014490 |
| 35 | C35 | -0.6354150 | 3.6609420  | 1.0735920  |
| 36 | H36 | -1.2192110 | 3.6279570  | 1.9885070  |
| 37 | C37 | -6.5541390 | 0.0003970  | -1.1203840 |
| 38 | H38 | -6.4264640 | 0.8853600  | -1.7410620 |
| 39 | H39 | -7.5492980 | 0.0006890  | -0.6745890 |
| 40 | H40 | -6.4269220 | -0.8847670 | -1.7408700 |
| 41 | C41 | 0.7469660  | 3.7737980  | 1.1816690  |
| 42 | H42 | 1.1992000  | 3.8112410  | 2.1674800  |
| 43 | C43 | 1.5300690  | 3.9258080  | 0.0341630  |
| 44 | C44 | 0.9109690  | 3.9661020  | -1.2180120 |
| 45 | H45 | 1.4846610  | 4.1665930  | -2.1191800 |
| 46 | C46 | 3.0264810  | 4.0677930  | 0.1482240  |
| 47 | H47 | 3.3572280  | 4.2388880  | 1.1735110  |
| 48 | H48 | 3.4426760  | 4.8373340  | -0.5050100 |
| 49 | N49 | 3.6711010  | 2.7295690  | -0.3050230 |
| 50 | H50 | 3.0916510  | 2.0009560  | 0.1208870  |
| 51 | H51 | 3.5132670  | 2.6623520  | -1.3173160 |

|    |     |            |            |            |
|----|-----|------------|------------|------------|
| 52 | C52 | 5.1382820  | 2.5419380  | 0.0022440  |
| 53 | H53 | 5.6562360  | 3.3994600  | -0.4349860 |
| 54 | H54 | 5.2585930  | 2.6102710  | 1.0857500  |
| 55 | C55 | 5.7402630  | 1.2661710  | -0.6093360 |
| 56 | H56 | 5.2899610  | 1.0527610  | -1.5813330 |
| 57 | H57 | 6.8084630  | 1.4242490  | -0.7757390 |
| 58 | N58 | 5.6340960  | -0.0002320 | 0.2442140  |
| 59 | H59 | 4.7230110  | -0.0001390 | 0.7096010  |
| 60 | C60 | 5.7399700  | -1.2665780 | -0.6094530 |
| 61 | H61 | 5.2896140  | -1.0530070 | -1.5813890 |
| 62 | H62 | 6.8081300  | -1.4248120 | -0.7759680 |
| 63 | C63 | 5.1378950  | -2.5423430 | 0.0020180  |
| 64 | H64 | 5.2586820  | -2.6110630 | 1.0854470  |
| 65 | H65 | 5.6554570  | -3.3998390 | -0.4357320 |
| 66 | N66 | 3.6705370  | -2.7295310 | -0.3046590 |
| 67 | H67 | 3.5121850  | -2.6615410 | -1.3168170 |
| 68 | H68 | 3.0913870  | -2.0011870 | 0.1221230  |
| 69 | C69 | 3.0259530  | -4.0680280 | 0.1478550  |
| 70 | H70 | 3.4420980  | -4.8371700 | -0.5058800 |
| 71 | H71 | 3.3567710  | -4.2397320 | 1.1730180  |
| 72 | C72 | 1.5295390  | -3.9259440 | 0.0339300  |
| 73 | C73 | 0.7464270  | -3.7747040 | 1.1815340  |
| 74 | H74 | 1.1986510  | -3.8128280 | 2.1673250  |
| 75 | C75 | 0.9104610  | -3.9653780 | -1.2182790 |
| 76 | H76 | 1.4841650  | -4.1652970 | -2.1195690 |
| 77 | C77 | 6.6858840  | -0.0004030 | 1.3414180  |
| 78 | H78 | 6.5656900  | -0.8903140 | 1.9574910  |
| 79 | H79 | 7.6668960  | -0.0005670 | 0.8652120  |
| 80 | H80 | 6.5659930  | 0.8895520  | 1.9574850  |
| 81 | F81 | -3.0335200 | 0.0000090  | -0.2007090 |

**Table S3.** Cartesian coordinates (in Å) and total energy (in au) for  $[\text{H}_6\text{L}(\text{Cl})]^{5+}$  in gas phase.  
Total energy: -1806.198089 au.

|    |     |            |           |            |
|----|-----|------------|-----------|------------|
| 1  | C1  | -0.4941290 | 3.9737680 | 1.2557190  |
| 2  | H2  | -0.9831190 | 3.8989430 | 2.2206280  |
| 3  | C3  | -1.2501280 | 4.0544780 | 0.0843800  |
| 4  | C4  | -0.6010380 | 4.2198090 | -1.1405330 |
| 5  | H5  | -1.1661870 | 4.3648910 | -2.0564480 |
| 6  | C6  | -2.7610340 | 4.0339660 | 0.1685980  |
| 7  | H7  | -3.0938150 | 4.0571020 | 1.2064800  |
| 8  | H8  | -3.2132330 | 4.8749350 | -0.3617360 |
| 9  | N9  | -3.3275800 | 2.7633230 | -0.4435830 |
| 10 | H10 | -2.7679240 | 1.9389940 | -0.1249750 |
| 11 | H11 | -3.1979430 | 2.8065260 | -1.4592440 |
| 12 | C12 | -4.7845010 | 2.5337870 | -0.1361830 |

|    |     |            |            |            |
|----|-----|------------|------------|------------|
| 13 | H13 | -5.3373170 | 3.3830260  | -0.5432030 |
| 14 | H14 | -4.8870240 | 2.5655510  | 0.9492340  |
| 15 | C15 | -5.3470470 | 1.2465990  | -0.7523050 |
| 16 | H16 | -4.8974400 | 1.0631840  | -1.7305970 |
| 17 | H17 | -6.4231450 | 1.3650420  | -0.8986480 |
| 18 | N18 | -5.1502270 | 0.0001790  | 0.0841740  |
| 19 | H19 | -4.1468950 | 0.0000580  | 0.3805970  |
| 20 | C20 | -5.3474420 | -1.2463160 | -0.7521060 |
| 21 | H21 | -4.8981220 | -1.0630880 | -1.7305640 |
| 22 | H22 | -6.4235990 | -1.3646630 | -0.8981070 |
| 23 | C23 | -4.7848550 | -2.5334740 | -0.1359640 |
| 24 | H24 | -4.8871830 | -2.5651100 | 0.9494770  |
| 25 | H25 | -5.3377910 | -3.3827270 | -0.5427930 |
| 26 | N26 | -3.3279960 | -2.7631300 | -0.4435760 |
| 27 | H27 | -3.1985000 | -2.8063720 | -1.4592530 |
| 28 | H28 | -2.7682260 | -1.9388540 | -0.1250490 |
| 29 | C29 | -2.7614760 | -4.0338060 | 0.1685730  |
| 30 | H30 | -3.2137120 | -4.8747490 | -0.3617690 |
| 31 | H31 | -3.0942480 | -4.0569470 | 1.2064580  |
| 32 | C32 | -1.2505710 | -4.0543720 | 0.0843480  |
| 33 | C33 | -0.4945710 | -3.9737040 | 1.2556880  |
| 34 | H34 | -0.9835580 | -3.8988550 | 2.2205970  |
| 35 | C35 | -0.6014870 | -4.2197290 | -1.1405650 |
| 36 | H36 | -1.1666400 | -4.3647750 | -2.0564820 |
| 37 | C37 | -6.0385950 | 0.0003990  | 1.2956510  |
| 38 | H38 | -5.8349530 | -0.8817630 | 1.8980710  |
| 39 | H39 | -7.0788990 | 0.0008180  | 0.9690570  |
| 40 | H40 | -5.8342640 | 0.8822660  | 1.8982670  |
| 41 | C41 | 0.7878500  | -4.2590710 | -1.2031020 |
| 42 | H42 | 1.2716340  | -4.4182250 | -2.1612480 |
| 43 | C43 | 1.5414860  | -4.1692650 | -0.0305290 |
| 44 | C44 | 0.8915330  | -4.0496360 | 1.2008900  |
| 45 | H45 | 1.4514120  | -4.0685060 | 2.1325320  |
| 46 | C46 | 3.0470300  | -4.2157170 | -0.0844180 |
| 47 | H47 | 3.4292960  | -4.4775610 | -1.0719000 |
| 48 | H48 | 3.4890090  | -4.8724410 | 0.6678690  |
| 49 | N49 | 3.5764300  | -2.7914710 | 0.2320560  |
| 50 | H50 | 3.0091880  | -2.1624640 | -0.3438660 |
| 51 | H51 | 3.3115590  | -2.6023480 | 1.2055120  |
| 52 | C52 | 5.0569050  | -2.5669570 | 0.0379610  |
| 53 | H53 | 5.5611960  | -3.3890990 | 0.5525010  |
| 54 | H54 | 5.2702500  | -2.6763570 | -1.0273290 |
| 55 | C55 | 5.5822750  | -1.2593660 | 0.6501140  |
| 56 | H56 | 5.0890600  | -1.0543100 | 1.6030100  |
| 57 | H57 | 6.6490290  | -1.3773990 | 0.8563810  |
| 58 | N58 | 5.4663190  | -0.0002220 | -0.2119770 |

|    |      |            |            |            |
|----|------|------------|------------|------------|
| 59 | H59  | 4.5486390  | -0.0001670 | -0.6643940 |
| 60 | C60  | 5.5824670  | 1.2589560  | 0.6500430  |
| 61 | H61  | 5.0892960  | 1.0540040  | 1.6029830  |
| 62 | H62  | 6.6492490  | 1.3768890  | 0.8562290  |
| 63 | C63  | 5.0571940  | 2.5665680  | 0.0378570  |
| 64 | H64  | 5.2704750  | 2.6758910  | -1.0274540 |
| 65 | H65  | 5.5616080  | 3.3886830  | 0.5523190  |
| 66 | N66  | 3.5767580  | 2.7912480  | 0.2320530  |
| 67 | H67  | 3.3119390  | 2.6021710  | 1.2055330  |
| 68 | H68  | 3.0094070  | 2.1622900  | -0.3438140 |
| 69 | C69  | 3.0474820  | 4.2155430  | -0.0844060 |
| 70 | H70  | 3.4895250  | 4.8722230  | 0.6678810  |
| 71 | H71  | 3.4297610  | 4.4773600  | -1.0718900 |
| 72 | C72  | 1.5419350  | 4.1692120  | -0.0305050 |
| 73 | C73  | 0.7883010  | 4.2590700  | -1.2030750 |
| 74 | H74  | 1.2720890  | 4.4182010  | -2.1612220 |
| 75 | C75  | 0.8919790  | 4.0496250  | 1.2009170  |
| 76 | H76  | 1.4518640  | 4.0684560  | 2.1325560  |
| 77 | C77  | 6.5090870  | -0.0003340 | -1.3154090 |
| 78 | H78  | 6.3850430  | 0.8884270  | -1.9318100 |
| 79 | H79  | 7.4938610  | -0.0004500 | -0.8468720 |
| 80 | H80  | 6.3848360  | -0.8890570 | -1.9318240 |
| 81 | Cl81 | -2.0937250 | 0.0000400  | 0.2567330  |

**Table S4.** Cartesian coordinates (in Å) and total energy (in au) for  $[\text{H}_6\text{L}(\text{Br})]^{5+}$  in gas phase.  
Total energy: -3920.175348 au.

|    |     |            |            |            |
|----|-----|------------|------------|------------|
| 1  | C1  | -0.4070760 | -4.1172020 | -1.2153220 |
| 2  | H2  | -0.9042850 | -4.0969070 | -2.1787080 |
| 3  | C3  | -1.1530020 | -4.1367900 | -0.0351850 |
| 4  | C4  | -0.4943330 | -4.2349410 | 1.1917980  |
| 5  | H5  | -1.0518420 | -4.3339540 | 2.1184690  |
| 6  | C6  | -2.6643350 | -4.1097630 | -0.1071260 |
| 7  | H7  | -3.0067010 | -4.1531760 | -1.1412290 |
| 8  | H8  | -3.1201820 | -4.9332860 | 0.4469370  |
| 9  | N9  | -3.2093970 | -2.8174650 | 0.4815200  |
| 10 | H10 | -2.6162870 | -2.0170810 | 0.1649340  |
| 11 | H11 | -3.0996320 | -2.8526750 | 1.4998280  |
| 12 | C12 | -4.6507760 | -2.5445800 | 0.1430690  |
| 13 | H13 | -5.2366650 | -3.3786810 | 0.5349040  |
| 14 | H14 | -4.7301010 | -2.5706610 | -0.9443110 |
| 15 | C15 | -5.1878940 | -1.2432130 | 0.7530620  |
| 16 | H16 | -4.7362010 | -1.0646850 | 1.7313240  |
| 17 | H17 | -6.2664090 | -1.3391970 | 0.8981720  |
| 18 | N18 | -4.9706520 | 0.0006850  | -0.0835410 |
| 19 | H19 | -3.9655950 | 0.0003900  | -0.3694350 |

|    |     |            |            |            |
|----|-----|------------|------------|------------|
| 20 | C20 | -5.1866650 | 1.2438430  | 0.7544660  |
| 21 | H21 | -4.7336340 | 1.0642450  | 1.7319180  |
| 22 | H22 | -6.2649700 | 1.3398040  | 0.9011370  |
| 23 | C23 | -4.6503100 | 2.5458930  | 0.1452910  |
| 24 | H24 | -4.7323550 | 2.5740870  | -0.9418250 |
| 25 | H25 | -5.2348320 | 3.3795350  | 0.5401540  |
| 26 | N26 | -3.2080160 | 2.8174180  | 0.4809490  |
| 27 | H27 | -3.0961250 | 2.8509120  | 1.4990910  |
| 28 | H28 | -2.6159250 | 2.0171470  | 0.1621900  |
| 29 | C29 | -2.6633360 | 4.1103260  | -0.1065980 |
| 30 | H30 | -3.1190800 | 4.9332450  | 0.4484620  |
| 31 | H31 | -3.0060240 | 4.1547340  | -1.1405520 |
| 32 | C32 | -1.1519920 | 4.1373230  | -0.0349180 |
| 33 | C33 | -0.4061900 | 4.1200660  | -1.2151490 |
| 34 | H34 | -0.9034750 | 4.1019260  | -2.1785390 |
| 35 | C35 | -0.4931850 | 4.2329980  | 1.1921860  |
| 36 | H36 | -1.0506240 | 4.3302540  | 2.1190910  |
| 37 | C37 | -5.8408850 | 0.0016830  | -1.3089840 |
| 38 | H38 | -5.6261010 | 0.8827590  | -1.9089560 |
| 39 | H39 | -6.8859260 | 0.0034870  | -0.9977770 |
| 40 | H40 | -5.6291370 | -0.8806900 | -1.9081480 |
| 41 | C41 | 0.8963890  | 4.2598720  | 1.2452690  |
| 42 | H42 | 1.3888620  | 4.3653760  | 2.2064350  |
| 43 | C43 | 1.6405230  | 4.2262750  | 0.0633150  |
| 44 | C44 | 0.9810170  | 4.1820650  | -1.1676410 |
| 45 | H45 | 1.5348290  | 4.2445670  | -2.1008350 |
| 46 | C46 | 3.1463650  | 4.2462870  | 0.1100970  |
| 47 | H47 | 3.5378340  | 4.4802870  | 1.1009690  |
| 48 | H48 | 3.5959920  | 4.9110650  | -0.6303390 |
| 49 | N49 | 3.6504480  | 2.8197710  | -0.2377640 |
| 50 | H50 | 3.0723030  | 2.1872490  | 0.3236320  |
| 51 | H51 | 3.3833980  | 2.6556250  | -1.2153010 |
| 52 | C52 | 5.1269380  | 2.5697860  | -0.0470870 |
| 53 | H53 | 5.6431010  | 3.3874510  | -0.5568070 |
| 54 | H54 | 5.3426910  | 2.6698280  | 1.0185940  |
| 55 | C55 | 5.6321060  | 1.2574470  | -0.6663910 |
| 56 | H56 | 5.1244690  | 1.0557560  | -1.6124190 |
| 57 | H57 | 6.6971150  | 1.3654220  | -0.8867200 |
| 58 | N58 | 5.5174300  | -0.0004490 | 0.1973500  |
| 59 | H59 | 4.6005240  | -0.0003150 | 0.6515660  |
| 60 | C60 | 5.6317650  | -1.2584560 | -0.6662920 |
| 61 | H61 | 5.1241330  | -1.0566950 | -1.6123070 |
| 62 | H62 | 6.6967370  | -1.3666870 | -0.8866570 |
| 63 | C63 | 5.1262800  | -2.5706240 | -0.0468770 |
| 64 | H64 | 5.3418460  | -2.6705710 | 1.0188500  |
| 65 | H65 | 5.6423680  | -3.3884540 | -0.5564110 |

|    |      |            |            |            |
|----|------|------------|------------|------------|
| 66 | N66  | 3.6497810  | -2.8203410 | -0.2377890 |
| 67 | H67  | 3.3829630  | -2.6561170 | -1.2153720 |
| 68 | H68  | 3.0716000  | -2.1877290 | 0.3234800  |
| 69 | C69  | 3.1453260  | -4.2467510 | 0.1099060  |
| 70 | H70  | 3.5947660  | -4.9115560 | -0.6306240 |
| 71 | H71  | 3.5367160  | -4.4810110 | 1.1007460  |
| 72 | C72  | 1.6394810  | -4.2262880 | 0.0631130  |
| 73 | C73  | 0.8952460  | -4.2620170 | 1.2449350  |
| 74 | H74  | 1.3876290  | -4.3693070 | 2.2059470  |
| 75 | C75  | 0.9801000  | -4.1795840 | -1.1678270 |
| 76 | H76  | 1.5339510  | -4.2404700 | -2.1011110 |
| 77 | C77  | 6.5636450  | -0.0005480 | 1.2970830  |
| 78 | H78  | 6.4414760  | -0.8887580 | 1.9145250  |
| 79 | H79  | 7.5469390  | -0.0009700 | 0.8254140  |
| 80 | H80  | 6.4420810  | 0.8880320  | 1.9141110  |
| 81 | Br81 | -1.7363020 | -0.0005580 | -0.2588780 |

**Table S5.** Cartesian coordinates (in Å) and total energy (in au) for  $[\text{H}_6\text{L}(\text{I})]^{5+}$  in gas phase. Total energy: -1357.336447 au.

|    |     |            |            |            |
|----|-----|------------|------------|------------|
| 1  | C1  | -0.4162350 | -4.2882410 | -1.1828150 |
| 2  | H2  | -0.9241700 | -4.3044760 | -2.1406910 |
| 3  | C3  | -1.1475860 | -4.2837990 | 0.0059800  |
| 4  | C4  | -0.4773950 | -4.3392740 | 1.2290360  |
| 5  | H5  | -1.0261240 | -4.4194740 | 2.1627430  |
| 6  | C6  | -2.6580040 | -4.2433310 | -0.0447970 |
| 7  | H7  | -3.0231660 | -4.3455390 | -1.0668760 |
| 8  | H8  | -3.1209990 | -5.0152310 | 0.5735150  |
| 9  | N9  | -3.1563720 | -2.8973290 | 0.4705780  |
| 10 | H10 | -2.5133580 | -2.1524150 | 0.1309390  |
| 11 | H11 | -3.0554550 | -2.8864000 | 1.4909620  |
| 12 | C12 | -4.5779610 | -2.5729110 | 0.1007290  |
| 13 | H13 | -5.2034110 | -3.3693110 | 0.5103970  |
| 14 | H14 | -4.6465580 | -2.6325210 | -0.9856110 |
| 15 | C15 | -5.0783210 | -1.2396930 | 0.6696480  |
| 16 | H16 | -4.6742650 | -1.0757910 | 1.6714020  |
| 17 | H17 | -6.1668660 | -1.2849540 | 0.7534760  |
| 18 | N18 | -4.7651290 | -0.0019840 | -0.1493750 |
| 19 | H19 | -3.7401220 | -0.0014300 | -0.3334780 |
| 20 | C20 | -5.0798110 | 1.2358010  | 0.6689740  |
| 21 | H21 | -4.6760910 | 1.0727100  | 1.6709950  |
| 22 | H22 | -6.1684310 | 1.2801050  | 0.7522880  |
| 23 | C23 | -4.5803650 | 2.5691960  | 0.0996470  |
| 24 | H24 | -4.6481070 | 2.6280320  | -0.9867910 |
| 25 | H25 | -5.2069540 | 3.3652280  | 0.5082820  |
| 26 | N26 | -3.1593960 | 2.8952610  | 0.4704040  |

|    |     |            |            |            |
|----|-----|------------|------------|------------|
| 27 | H27 | -3.0592060 | 2.8849830  | 1.4908650  |
| 28 | H28 | -2.5154120 | 2.1508440  | 0.1315430  |
| 29 | C29 | -2.6620060 | 4.2415070  | -0.0453220 |
| 30 | H30 | -3.1257410 | 5.0132430  | 0.5726350  |
| 31 | H31 | -3.0270420 | 4.3430860  | -1.0675110 |
| 32 | C32 | -1.1516300 | 4.2831630  | 0.0057060  |
| 33 | C33 | -0.4201070 | 4.2875220  | -1.1829840 |
| 34 | H34 | -0.9279130 | 4.3029190  | -2.1409410 |
| 35 | C35 | -0.4816610 | 4.3397160  | 1.2288360  |
| 36 | H36 | -1.0305880 | 4.4200000  | 2.1624190  |
| 37 | C37 | -5.4941750 | -0.0027250 | -1.4638670 |
| 38 | H38 | -5.2153900 | 0.8775630  | -2.0375020 |
| 39 | H39 | -6.5674530 | -0.0034260 | -1.2705120 |
| 40 | H40 | -5.2141720 | -0.8828000 | -2.0372340 |
| 41 | C41 | 0.9079490  | 4.3417550  | 1.2679800  |
| 42 | H42 | 1.4127750  | 4.4134270  | 2.2258160  |
| 43 | C43 | 1.6384710  | 4.3207580  | 0.0775400  |
| 44 | C44 | 0.9680780  | 4.3229080  | -1.1479400 |
| 45 | H45 | 1.5153770  | 4.3964490  | -2.0840020 |
| 46 | C46 | 3.1437670  | 4.2955370  | 0.1106870  |
| 47 | H47 | 3.5506560  | 4.5119410  | 1.0993260  |
| 48 | H48 | 3.6065230  | 4.9509730  | -0.6299650 |
| 49 | N49 | 3.6014380  | 2.8574850  | -0.2489450 |
| 50 | H50 | 3.0126890  | 2.2354500  | 0.3141450  |
| 51 | H51 | 3.3197270  | 2.7044960  | -1.2243000 |
| 52 | C52 | 5.0735250  | 2.5764320  | -0.0736860 |
| 53 | H53 | 5.6003390  | 3.3850460  | -0.5868150 |
| 54 | H54 | 5.3012970  | 2.6712550  | 0.9898170  |
| 55 | C55 | 5.5490960  | 1.2565470  | -0.6987770 |
| 56 | H56 | 5.0233340  | 1.0598060  | -1.6359280 |
| 57 | H57 | 6.6119570  | 1.3486210  | -0.9361690 |
| 58 | N58 | 5.4315830  | 0.0017870  | 0.1676680  |
| 59 | H59 | 4.5117590  | 0.0008670  | 0.6164820  |
| 60 | C60 | 5.5518120  | -1.2531140 | -0.6982830 |
| 61 | H61 | 5.0273980  | -1.0572690 | -1.6363730 |
| 62 | H62 | 6.6151560  | -1.3442430 | -0.9338850 |
| 63 | C63 | 5.0765810  | -2.5731900 | -0.0733750 |
| 64 | H64 | 5.3033940  | -2.6675480 | 0.9903820  |
| 65 | H65 | 5.6044770  | -3.3815540 | -0.5857930 |
| 66 | N66 | 3.6048600  | -2.8553900 | -0.2498920 |
| 67 | H67 | 3.3240170  | -2.7032960 | -1.2256350 |
| 68 | H68 | 3.0151400  | -2.2333710 | 0.3121920  |
| 69 | C69 | 3.1478540  | -4.2934910 | 0.1104400  |
| 70 | H70 | 3.6109350  | -4.9490800 | -0.6298720 |
| 71 | H71 | 3.5548600  | -4.5091980 | 1.0991820  |
| 72 | C72 | 1.6425610  | -4.3195230 | 0.0774100  |



|    |     |            |            |            |
|----|-----|------------|------------|------------|
| 73 | C73 | 0.9122160  | -4.3403910 | 1.2679670  |
| 74 | H74 | 1.4172360  | -4.4112790 | 2.2257600  |
| 75 | C75 | 0.9719850  | -4.3226950 | -1.1479690 |
| 76 | H76 | 1.5191830  | -4.3963170 | -2.0840810 |
| 77 | C77 | 6.4738980  | 0.0030220  | 1.2701510  |
| 78 | H78 | 6.3524380  | -0.8857450 | 1.8866730  |
| 79 | H79 | 7.4588230  | 0.0059040  | 0.8018430  |
| 80 | H80 | 6.3480880  | 0.8896820  | 1.8888300  |
| 81 | I81 | -1.2270690 | -0.0001450 | -0.1241800 |

**Table S6.** Cartesian coordinates (in Å) and total energy (in au) for  $[\text{H}_6\text{L}(\text{F})_2]^{4+}$  in gas phase. Total energy: -1546.315507 au.

|    |     |           |            |            |
|----|-----|-----------|------------|------------|
| 1  | C1  | 0.5728670 | 3.6526120  | -1.2339990 |
| 2  | H2  | 1.0095810 | 3.7673450  | -2.2197800 |
| 3  | C3  | 1.3912940 | 3.5460540  | -0.1097410 |
| 4  | C4  | 0.8053600 | 3.4454640  | 1.1523360  |
| 5  | H5  | 1.4114260 | 3.4282680  | 2.0536720  |
| 6  | C6  | 2.8905490 | 3.6371030  | -0.2716040 |
| 7  | H7  | 3.1676660 | 3.6615510  | -1.3256590 |
| 8  | H8  | 3.2942020 | 4.5289860  | 0.2141550  |
| 9  | N9  | 3.5975350 | 2.4473550  | 0.3352800  |
| 10 | H10 | 3.2023980 | 1.5363650  | -0.0285450 |
| 11 | H11 | 3.4245700 | 2.4487680  | 1.3436410  |
| 12 | C12 | 5.0814440 | 2.4518630  | 0.0927480  |
| 13 | H13 | 5.4842210 | 3.3688030  | 0.5262520  |
| 14 | H14 | 5.2241220 | 2.5048900  | -0.9879000 |
| 15 | C15 | 5.8029460 | 1.2524200  | 0.7129130  |
| 16 | H16 | 5.4017030 | 1.0447320  | 1.7067160  |
| 17 | H17 | 6.8615260 | 1.4939940  | 0.8298320  |
| 18 | N18 | 5.6899460 | -0.0001070 | -0.1127100 |
| 19 | H19 | 4.6573560 | -0.0001110 | -0.4544940 |
| 20 | C20 | 5.8029490 | -1.2526150 | 0.7129530  |
| 21 | H21 | 5.4017440 | -1.0448840 | 1.7067620  |
| 22 | H22 | 6.8615280 | -1.4942020 | 0.8298410  |
| 23 | C23 | 5.0813880 | -2.4520520 | 0.0928420  |
| 24 | H24 | 5.2239860 | -2.5050630 | -0.9878180 |
| 25 | H25 | 5.4841840 | -3.3690040 | 0.5263030  |
| 26 | N26 | 3.5975000 | -2.4474720 | 0.3354820  |
| 27 | H27 | 3.4246300 | -2.4491170 | 1.3438570  |
| 28 | H28 | 3.2024740 | -1.5363040 | -0.0281580 |
| 29 | C29 | 2.8903760 | -3.6369860 | -0.2716460 |
| 30 | H30 | 3.2939760 | -4.5290420 | 0.2138460  |
| 31 | H31 | 3.1674220 | -3.6611930 | -1.3257250 |
| 32 | C32 | 1.3911250 | -3.5458980 | -0.1097100 |
| 33 | C33 | 0.5726650 | -3.6530770 | -1.2338840 |

|    |     |            |            |            |
|----|-----|------------|------------|------------|
| 34 | H34 | 1.0093590  | -3.7682300 | -2.2196250 |
| 35 | C35 | 0.8052220  | -3.4447270 | 1.1523350  |
| 36 | H36 | 1.4112900  | -3.4270490 | 2.0536590  |
| 37 | C37 | 6.6563220  | -0.0001310 | -1.2525000 |
| 38 | H38 | 6.4963040  | -0.8839060 | -1.8672670 |
| 39 | H39 | 7.6741190  | -0.0001030 | -0.8607740 |
| 40 | H40 | 6.4962780  | 0.8835920  | -1.8673340 |
| 41 | C41 | -0.5774280 | -3.4231300 | 1.2876570  |
| 42 | H42 | -1.0138240 | -3.3581110 | 2.2779830  |
| 43 | C43 | -1.3953790 | -3.5459080 | 0.1651060  |
| 44 | C44 | -0.8094370 | -3.6746620 | -1.0946180 |
| 45 | H45 | -1.4182640 | -3.8367110 | -1.9797600 |
| 46 | C46 | -2.8941470 | -3.6209570 | 0.3298800  |
| 47 | H47 | -3.1765650 | -3.6011390 | 1.3826480  |
| 48 | H48 | -3.3038000 | -4.5262750 | -0.1241060 |
| 49 | N49 | -3.5848620 | -2.4467720 | -0.3270480 |
| 50 | H50 | -3.2055540 | -1.5281810 | 0.0365240  |
| 51 | H51 | -3.3710210 | -2.4678230 | -1.3277300 |
| 52 | C52 | -5.0759260 | -2.4511400 | -0.1384540 |
| 53 | H53 | -5.4637130 | -3.3693270 | -0.5827400 |
| 54 | H54 | -5.2580710 | -2.5002090 | 0.9365250  |
| 55 | C55 | -5.7729140 | -1.2526860 | -0.7878680 |
| 56 | H56 | -5.3313720 | -1.0447320 | -1.7642640 |
| 57 | H57 | -6.8258390 | -1.4938250 | -0.9477200 |
| 58 | N58 | -5.6938620 | 0.0000330  | 0.0417770  |
| 59 | H59 | -4.6793260 | -0.0000110 | 0.4255980  |
| 60 | C60 | -5.7727180 | 1.2526740  | -0.7879980 |
| 61 | H61 | -5.3310380 | 1.0445840  | -1.7643030 |
| 62 | H62 | -6.8256050 | 1.4938500  | -0.9480330 |
| 63 | C63 | -5.0757570 | 2.4511800  | -0.1386430 |
| 64 | H64 | -5.2580100 | 2.5003930  | 0.9363110  |
| 65 | H65 | -5.4634790 | 3.3693200  | -0.5830840 |
| 66 | N66 | -3.5846760 | 2.4467400  | -0.3270930 |
| 67 | H67 | -3.3707510 | 2.4676030  | -1.3277600 |
| 68 | H68 | -3.2054610 | 1.5281520  | 0.0366490  |
| 69 | C69 | -2.8939970 | 3.6210170  | 0.3296810  |
| 70 | H70 | -3.3036330 | 4.5262690  | -0.1244560 |
| 71 | H71 | -3.1764530 | 3.6013650  | 1.3824410  |
| 72 | C72 | -1.3952150 | 3.5459710  | 0.1649830  |
| 73 | C73 | -0.5772910 | 3.4238240  | 1.2876260  |
| 74 | H74 | -1.0137120 | 3.3592740  | 2.2779700  |
| 75 | C75 | -0.8092420 | 3.6741410  | -1.0947840 |
| 76 | H76 | -1.4180440 | 3.8356920  | -1.9800350 |
| 77 | C77 | -6.7068420 | 0.0001590  | 1.1408420  |
| 78 | H78 | -6.5730550 | 0.8839560  | 1.7618660  |
| 79 | H79 | -7.7072280 | 0.0003950  | 0.7064820  |

|    |     |            |            |            |
|----|-----|------------|------------|------------|
| 80 | H80 | -6.5734320 | -0.8838010 | 1.7617180  |
| 81 | F81 | 3.2569500  | -0.0001730 | -0.3916370 |
| 82 | F82 | -3.2679700 | 0.0000290  | 0.4091150  |

**Table S7.** Cartesian coordinates (in Å) and total energy (in au) for  $[\text{H}_6\text{L}(\text{Cl})_2]^{4+}$  in gas phase. Total energy: -2267.041014 au.

|    |     |           |            |            |
|----|-----|-----------|------------|------------|
| 1  | C1  | 0.6305920 | 4.0625610  | -1.1746830 |
| 2  | H2  | 1.1088540 | 4.2218170  | -2.1344840 |
| 3  | C3  | 1.3978560 | 3.8849140  | -0.0245930 |
| 4  | C4  | 0.7628470 | 3.7188180  | 1.2063060  |
| 5  | H5  | 1.3331910 | 3.6416130  | 2.1275230  |
| 6  | C6  | 2.9038550 | 3.9316410  | -0.1192030 |
| 7  | H7  | 3.2290680 | 4.0265260  | -1.1554390 |
| 8  | H8  | 3.3316900 | 4.7519920  | 0.4618640  |
| 9  | N9  | 3.5148490 | 2.6485710  | 0.4116050  |
| 10 | H10 | 2.9979810 | 1.8316990  | 0.0011550  |
| 11 | H11 | 3.3510180 | 2.6065590  | 1.4213200  |
| 12 | C12 | 4.9823290 | 2.5094740  | 0.1274840  |
| 13 | H13 | 5.4823220 | 3.3757800  | 0.5650760  |
| 14 | H14 | 5.1006220 | 2.5712240  | -0.9551490 |
| 15 | C15 | 5.6069180 | 1.2428880  | 0.7209880  |
| 16 | H16 | 5.2070760 | 1.0565250  | 1.7202540  |
| 17 | H17 | 6.6843890 | 1.3926960  | 0.8200900  |
| 18 | N18 | 5.3991020 | -0.0047600 | -0.1011650 |
| 19 | H19 | 4.3830820 | -0.0031420 | -0.4109630 |
| 20 | C20 | 5.6027750 | -1.2528190 | 0.7213720  |
| 21 | H21 | 5.2027450 | -1.0650690 | 1.7203070  |
| 22 | H22 | 6.6797510 | -1.4056270 | 0.8213140  |
| 23 | C23 | 4.9751390 | -2.5178870 | 0.1278420  |
| 24 | H24 | 5.0940630 | -2.5804090 | -0.9546760 |
| 25 | H25 | 5.4725150 | -3.3853500 | 0.5661240  |
| 26 | N26 | 3.5070830 | -2.6530650 | 0.4109620  |
| 27 | H27 | 3.3425940 | -2.6097130 | 1.4205160  |
| 28 | H28 | 2.9925630 | -1.8352300 | -0.0004610 |
| 29 | C29 | 2.8935320 | -3.9351880 | -0.1190720 |
| 30 | H30 | 3.3197990 | -4.7560070 | 0.4625040  |
| 31 | H31 | 3.2185850 | -4.0313550 | -1.1552390 |
| 32 | C32 | 1.3875970 | -3.8858110 | -0.0245130 |
| 33 | C33 | 0.6200670 | -4.0656670 | -1.1740770 |
| 34 | H34 | 1.0981200 | -4.2279440 | -2.1334790 |
| 35 | C35 | 0.7528170 | -3.7156830 | 1.2059600  |
| 36 | H36 | 1.3232010 | -3.6366160 | 2.1269930  |
| 37 | C37 | 6.2483290 | -0.0062810 | -1.3353940 |
| 38 | H38 | 6.0180730 | -0.8863790 | -1.9314440 |
| 39 | H39 | 7.2995330 | -0.0082090 | -1.0460010 |

|    |      |            |            |            |
|----|------|------------|------------|------------|
| 40 | H40  | 6.0213090  | 0.8747740  | -1.9312840 |
| 41 | C41  | -0.6332840 | -3.6922640 | 1.2839870  |
| 42 | H42  | -1.1116150 | -3.5612780 | 2.2480710  |
| 43 | C43  | -1.4006880 | -3.8840760 | 0.1357300  |
| 44 | C44  | -0.7663490 | -4.0868340 | -1.0896380 |
| 45 | H45  | -1.3414100 | -4.2973890 | -1.9868800 |
| 46 | C46  | -2.9056300 | -3.9046750 | 0.2296330  |
| 47 | H47  | -3.2398120 | -3.9064690 | 1.2675160  |
| 48 | H48  | -3.3434090 | -4.7611130 | -0.2873720 |
| 49 | N49  | -3.4865200 | -2.6556610 | -0.4094630 |
| 50 | H50  | -2.9988710 | -1.8190990 | -0.0028780 |
| 51 | H51  | -3.2507150 | -2.6666050 | -1.4062200 |
| 52 | C52  | -4.9686340 | -2.5087820 | -0.2285700 |
| 53 | H53  | -5.4422970 | -3.3780720 | -0.6884770 |
| 54 | H54  | -5.1610290 | -2.5574990 | 0.8441380  |
| 55 | C55  | -5.5440080 | -1.2446740 | -0.8746410 |
| 56 | H56  | -5.0651540 | -1.0596560 | -1.8387210 |
| 57 | H57  | -6.6102320 | -1.3936160 | -1.0589750 |
| 58 | N58  | -5.4015740 | 0.0041970  | -0.0397620 |
| 59 | H59  | -4.4143340 | 0.0017180  | 0.3475310  |
| 60 | C60  | -5.5354160 | 1.2515480  | -0.8781680 |
| 61 | H61  | -5.0512870 | 1.0624160  | -1.8388240 |
| 62 | H62  | -6.6000660 | 1.4030350  | -1.0692860 |
| 63 | C63  | -4.9600590 | 2.5159940  | -0.2326520 |
| 64 | H64  | -5.1564570 | 2.5679000  | 0.8391570  |
| 65 | H65  | -5.4302910 | 3.3850840  | -0.6964270 |
| 66 | N66  | -3.4770530 | 2.6593710  | -0.4088560 |
| 67 | H67  | -3.2381500 | 2.6675710  | -1.4049170 |
| 68 | H68  | -2.9925600 | 1.8223370  | 0.0005380  |
| 69 | C69  | -2.8953800 | 3.9085750  | 0.2289430  |
| 70 | H70  | -3.3320600 | 4.7647520  | -0.2894530 |
| 71 | H71  | -3.2300450 | 3.9121220  | 1.2666600  |
| 72 | C72  | -1.3904170 | 3.8864120  | 0.1354920  |
| 73 | C73  | -0.6232940 | 3.6969720  | 1.2843160  |
| 74 | H74  | -1.1018040 | 3.5690960  | 2.2487290  |
| 75 | C75  | -0.7557910 | 4.0853590  | -1.0903620 |
| 76 | H76  | -1.3305690 | 4.2941910  | -1.9881990 |
| 77 | C77  | -6.3495090 | 0.0087930  | 1.1205690  |
| 78 | H78  | -6.1621610 | 0.8843230  | 1.7380380  |
| 79 | H79  | -7.3727420 | 0.0214710  | 0.7444780  |
| 80 | H80  | -6.1817440 | -0.8769470 | 1.7290750  |
| 81 | Cl81 | 2.4783660  | -0.0004470 | -0.7497490 |
| 82 | Cl82 | -2.5219960 | -0.0000730 | 0.7988490  |

**Table S8.** Cartesian coordinates (in Å) and total energy (in au) for  $[\text{H}_6\text{L}(\text{Br})_2]^{4+}$  in gas phase.

Total energy: -6494.993578 au.

|    |     |            |            |            |
|----|-----|------------|------------|------------|
| 1  | C1  | 0.6903180  | 4.1148160  | -1.1585490 |
| 2  | H2  | 1.1941860  | 4.2688020  | -2.1059880 |
| 3  | C3  | 1.4259680  | 3.9458870  | 0.0132710  |
| 4  | C4  | 0.7579760  | 3.7881630  | 1.2276770  |
| 5  | H5  | 1.3041410  | 3.7181200  | 2.1640160  |
| 6  | C6  | 2.9344910  | 3.9800280  | -0.0392260 |
| 7  | H7  | 3.2906370  | 4.0875080  | -1.0640060 |
| 8  | H8  | 3.3554560  | 4.7845440  | 0.5681540  |
| 9  | N9  | 3.5116900  | 2.6785720  | 0.4873340  |
| 10 | H10 | 2.9815060  | 1.8818880  | 0.0544900  |
| 11 | H11 | 3.3280860  | 2.6272020  | 1.4931910  |
| 12 | C12 | 4.9785150  | 2.5053060  | 0.2241300  |
| 13 | H13 | 5.4915400  | 3.3626740  | 0.6642410  |
| 14 | H14 | 5.1122330  | 2.5577920  | -0.8572000 |
| 15 | C15 | 5.5651940  | 1.2281640  | 0.8344250  |
| 16 | H16 | 5.1295820  | 1.0451310  | 1.8192110  |
| 17 | H17 | 6.6407050  | 1.3624400  | 0.9703340  |
| 18 | N18 | 5.3726760  | -0.0180540 | 0.0050610  |
| 19 | H19 | 4.3721320  | -0.0111000 | -0.3439840 |
| 20 | C20 | 5.5460760  | -1.2649300 | 0.8373650  |
| 21 | H21 | 5.1058420  | -1.0752100 | 1.8188400  |
| 22 | H22 | 6.6191340  | -1.4104910 | 0.9808420  |
| 23 | C23 | 4.9499720  | -2.5374140 | 0.2263790  |
| 24 | H24 | 5.0889630  | -2.5939390 | -0.8540530 |
| 25 | H25 | 5.4524400  | -3.3986350 | 0.6711080  |
| 26 | N26 | 3.4802170  | -2.6964150 | 0.4825740  |
| 27 | H27 | 3.2918810  | -2.6389000 | 1.4872570  |
| 28 | H28 | 2.9592330  | -1.8967570 | 0.0445930  |
| 29 | C29 | 2.8947160  | -3.9954760 | -0.0405250 |
| 30 | H30 | 3.3100880  | -4.8007530 | 0.5697090  |
| 31 | H31 | 3.2508460  | -4.1084750 | -1.0647050 |
| 32 | C32 | 1.3864370  | -3.9518900 | 0.0114230  |
| 33 | C33 | 0.6497750  | -4.1205230 | -1.1598160 |
| 34 | H34 | 1.1527700  | -4.2800420 | -2.1068070 |
| 35 | C35 | 0.7193790  | -3.7870200 | 1.2253940  |
| 36 | H36 | 1.2659390  | -3.7170560 | 2.1615240  |
| 37 | C37 | 6.2613560  | -0.0256790 | -1.2017680 |
| 38 | H38 | 6.0400800  | -0.9017060 | -1.8072310 |
| 39 | H39 | 7.3023320  | -0.0390600 | -0.8780780 |
| 40 | H40 | 6.0618210  | 0.8592280  | -1.8019280 |
| 41 | C41 | -0.6681630 | -3.7548660 | 1.2656740  |
| 42 | H42 | -1.1718010 | -3.6263400 | 2.2170960  |
| 43 | C43 | -1.4051150 | -3.9315130 | 0.0950470  |
| 44 | C44 | -0.7388010 | -4.1320160 | -1.1135490 |

|    |      |            |            |            |
|----|------|------------|------------|------------|
| 45 | H45  | -1.2905420 | -4.3320810 | -2.0276300 |
| 46 | C46  | -2.9126380 | -3.9345520 | 0.1475930  |
| 47 | H47  | -3.2743920 | -3.9303010 | 1.1762090  |
| 48 | H48  | -3.3476690 | -4.7854070 | -0.3808120 |
| 49 | N49  | -3.4597420 | -2.6771920 | -0.5062590 |
| 50 | H5   | -2.9648370 | -1.8540310 | -0.0819680 |
| 51 | H51  | -3.2044380 | -2.6919040 | -1.4980380 |
| 52 | C52  | -4.9408540 | -2.4997770 | -0.3500420 |
| 53 | H53  | -5.4233310 | -3.3676860 | -0.8031460 |
| 54 | H54  | -5.1473630 | -2.5266850 | 0.7208970  |
| 55 | C55  | -5.4824550 | -1.2339490 | -1.0225980 |
| 56 | H56  | -4.9644080 | -1.0524730 | -1.9667940 |
| 57 | H57  | -6.5410410 | -1.3769290 | -1.2501870 |
| 58 | N58  | -5.3708710 | 0.0166530  | -0.1849370 |
| 59 | H59  | -4.4106970 | 0.0079470  | 0.2617610  |
| 60 | C60  | -5.4520280 | 1.2628080  | -1.0320510 |
| 61 | H61  | -4.9174230 | 1.0675830  | -1.9642530 |
| 62 | H62  | -6.5042570 | 1.4155240  | -1.2814890 |
| 63 | C63  | -4.9084800 | 2.5284710  | -0.3603470 |
| 64 | H64  | -5.1257320 | 2.5636080  | 0.7081160  |
| 65 | H65  | -5.3800340 | 3.3972540  | -0.8231080 |
| 66 | N66  | -3.4247400 | 2.6940770  | -0.5041280 |
| 67 | H67  | -3.1613860 | 2.7027380  | -1.4939180 |
| 68 | H68  | -2.9396470 | 1.8683220  | -0.0738490 |
| 69 | C69  | -2.8730940 | 3.9499980  | 0.1480920  |
| 70 | H70  | -3.3034160 | 4.8017920  | -0.3827050 |
| 71 | H71  | -3.2361370 | 3.9496040  | 1.1762540  |
| 72 | C72  | -1.3655920 | 3.9397300  | 0.0966080  |
| 73 | C73  | -0.6297290 | 3.7628440  | 1.2678540  |
| 74 | H74  | -1.1341620 | 3.6397120  | 2.2195760  |
| 75 | C75  | -0.6981410 | 4.1335030  | -1.1124630 |
| 76 | H76  | -1.2487720 | 4.3337440  | -2.0271980 |
| 77 | C77  | -6.3790630 | 0.0321080  | 0.9246240  |
| 78 | H78  | -6.2004460 | 0.8936230  | 1.5642500  |
| 79 | H79  | -7.3798050 | 0.0776620  | 0.4943220  |
| 80 | H80  | -6.2685720 | -0.8664510 | 1.5276440  |
| 81 | Br81 | 2.3359140  | 0.0001410  | -0.8637290 |
| 82 | Br82 | -2.4262570 | 0.0001780  | 0.9557340  |

Table S9. Cartesian coordinates (in Å) and total energy (in au) for  $[\text{H}_6\text{L}(\text{I})_2]^{4+}$  in gas phase.  
Total energy: -1369.310255 au.

|   |    |            |            |            |
|---|----|------------|------------|------------|
| 1 | C1 | -0.7391300 | -4.1973010 | -1.1308140 |
| 2 | H2 | -1.2808380 | -4.3383860 | -2.0591270 |
| 3 | C3 | -1.4263470 | -4.0353570 | 0.0707590  |

|    |     |            |            |            |
|----|-----|------------|------------|------------|
| 4  | C4  | -0.7116680 | -3.8931170 | 1.2601840  |
| 5  | H5  | -1.2219670 | -3.8278210 | 2.2169440  |
| 6  | C6  | -2.9355980 | -4.0453430 | 0.0775750  |
| 7  | H7  | -3.3355670 | -4.1683840 | -0.9292040 |
| 8  | H8  | -3.3480850 | -4.8245480 | 0.7223200  |
| 9  | N9  | -3.4633660 | -2.7171180 | 0.5947840  |
| 10 | H10 | -2.9235620 | -1.9536250 | 0.1205190  |
| 11 | H11 | -3.2399220 | -2.6461670 | 1.5915320  |
| 12 | C12 | -4.9318950 | -2.5100340 | 0.3728470  |
| 13 | H13 | -5.4506820 | -3.3541020 | 0.8316190  |
| 14 | H14 | -5.0961590 | -2.5650850 | -0.7041640 |
| 15 | C15 | -5.4768280 | -1.2201420 | 0.9947820  |
| 16 | H16 | -5.0148510 | -1.0438360 | 1.9687970  |
| 17 | H17 | -6.5511220 | -1.3344320 | 1.1567270  |
| 18 | N18 | -5.2872600 | 0.0254970  | 0.1627560  |
| 19 | H19 | -4.2996950 | 0.0147070  | -0.2103220 |
| 20 | C20 | -5.4444860 | 1.2700740  | 1.0027520  |
| 21 | H21 | -4.9683740 | 1.0815840  | 1.9676710  |
| 22 | H22 | -6.5140520 | 1.3988620  | 1.1837360  |
| 23 | C23 | -4.8912800 | 2.5559530  | 0.3795550  |
| 24 | H24 | -5.0668050 | 2.6179320  | -0.6952340 |
| 25 | H25 | -5.3952240 | 3.4040600  | 0.8472700  |
| 26 | N26 | -3.4182800 | 2.7447490  | 0.5873980  |
| 27 | H27 | -3.1863580 | 2.6693380  | 1.5819340  |
| 28 | H28 | -2.8923070 | 1.9747960  | 0.1079980  |
| 29 | C29 | -2.8792090 | 4.0672830  | 0.0681780  |
| 30 | H30 | -3.2850240 | 4.8509590  | 0.7117710  |
| 31 | H31 | -3.2779600 | 4.1922420  | -0.9388360 |
| 32 | C32 | -1.3701020 | 4.0448120  | 0.0623280  |
| 33 | C33 | -0.6803010 | 4.1994280  | -1.1387280 |
| 34 | H34 | -1.2198760 | 4.3426400  | -2.0679500 |
| 35 | C35 | -0.6578380 | 3.8999450  | 1.2528870  |
| 36 | H36 | -1.1696990 | 3.8403300  | 2.2092030  |
| 37 | C37 | -6.1885700 | 0.0399640  | -1.0350920 |
| 38 | H38 | -5.9555000 | 0.9064510  | -1.6496460 |
| 39 | H39 | -7.2254600 | 0.0730360  | -0.7001210 |
| 40 | H40 | -6.0081560 | -0.8517780 | -1.6310530 |
| 41 | C41 | 0.7298160  | 3.8707320  | 1.2403580  |
| 42 | H42 | 1.2701000  | 3.7542300  | 2.1730620  |
| 43 | C43 | 1.4201960  | 4.0274370  | 0.0389050  |
| 44 | C44 | 0.7090470  | 4.2113750  | -1.1462400 |
| 45 | H45 | 1.2260990  | 4.3951810  | -2.0835810 |
| 46 | C46 | 2.9282830  | 4.0153610  | 0.0346580  |
| 47 | H47 | 3.3278880  | 4.0305870  | 1.0491590  |
| 48 | H48 | 3.3556420  | 4.8456630  | -0.5312270 |
| 49 | N49 | 3.4341750  | 2.7320980  | -0.6065220 |

|    |     |            |            |            |
|----|-----|------------|------------|------------|
| 50 | H50 | 2.9115530  | 1.9379170  | -0.1659100 |
| 51 | H51 | 3.1712960  | 2.7383980  | -1.5965480 |
| 52 | C52 | 4.9085870  | 2.5087470  | -0.4515100 |
| 53 | H53 | 5.4160320  | 3.3600890  | -0.9089750 |
| 54 | H54 | 5.1158710  | 2.5350560  | 0.6192720  |
| 55 | C55 | 5.4140830  | 1.2265240  | -1.1210960 |
| 56 | H56 | 4.8900590  | 1.0555870  | -2.0640590 |
| 57 | H57 | 6.4757640  | 1.3414990  | -1.3508060 |
| 58 | N58 | 5.2784590  | -0.0241260 | -0.2849470 |
| 59 | H59 | 4.3201480  | -0.0108630 | 0.1550810  |
| 60 | C60 | 5.3659620  | -1.2645070 | -1.1417180 |
| 61 | H61 | 4.8112760  | -1.0695950 | -2.0623450 |
| 62 | H62 | 6.4170190  | -1.3905250 | -1.4107480 |
| 63 | C63 | 4.8632470  | -2.5510220 | -0.4776870 |
| 64 | H64 | 5.0922720  | -2.5944900 | 0.5879230  |
| 65 | H65 | 5.3532970  | -3.4008170 | -0.9563200 |
| 66 | N66 | 3.3840620  | -2.7572950 | -0.6082280 |
| 67 | H67 | 3.1057460  | -2.7576900 | -1.5941210 |
| 68 | H68 | 2.8779360  | -1.9571730 | -0.1588830 |
| 69 | C69 | 2.8720700  | -4.0356580 | 0.0365840  |
| 70 | H70 | 3.2919310  | -4.8699200 | -0.5291510 |
| 71 | H71 | 3.2742670  | -4.0519400 | 1.0500480  |
| 72 | C72 | 1.3639250  | -4.0372320 | 0.0439050  |
| 73 | C73 | 0.6761610  | -3.8733430 | 1.2458710  |
| 74 | H74 | 1.2184620  | -3.7589270 | 2.1776730  |
| 75 | C75 | 0.6500300  | -4.2187980 | -1.1399700 |
| 76 | H76 | 1.1647100  | -4.4081250 | -2.0775530 |
| 77 | C77 | 6.2681400  | -0.0510050 | 0.8414090  |
| 78 | H78 | 6.0561810  | -0.8998550 | 1.4874430  |
| 79 | H79 | 7.2741950  | -0.1237370 | 0.4277260  |
| 80 | H80 | 6.1673650  | 0.8556900  | 1.4334980  |
| 81 | I81 | -2.1121120 | 0.0007590  | -1.0658340 |
| 82 | I82 | 2.1466370  | -0.0020850 | 1.0721770  |
